# Supplementary material for: Cobalt oxide nanoparticle embedded N-CNTs: lithium ion battery applications
Source: Royal Society of Chemistry journal article supplement (doi:10.1039/c5ra23222h), 2015-12-15
Supplement: c5ra23222h1.pdf [file c5ra23222h1.pdf]

## **Supporting Information**

### **Cobalt oxide nanoparticles embedded N-CNTs: Lithium ion battery applications**

I. A. Khan,<sup>a</sup> F. Nasim,<sup>a</sup> M. Choucair,<sup>\*b</sup> S. Ullah,<sup>a</sup> A. Badshah,<sup>a</sup> and M. A. Nadeem<sup>\*a</sup>

<sup>1</sup>Catalysis and Nanomaterials Lab 27, Department of Chemistry, Quaid-i-Azam University, Islamabad 45320, Pakistan

<sup>2</sup>School of Chemistry, University of Sydney, Sydney, Australia 2006

\*E-mail: [manadeem@qau.edu.pk](mailto:manadeem@qau.edu.pk), Telephone: +925190642062

\*E-mail: [mohammad.choucair@sydney.edu.au](mailto:mohammad.choucair@sydney.edu.au)

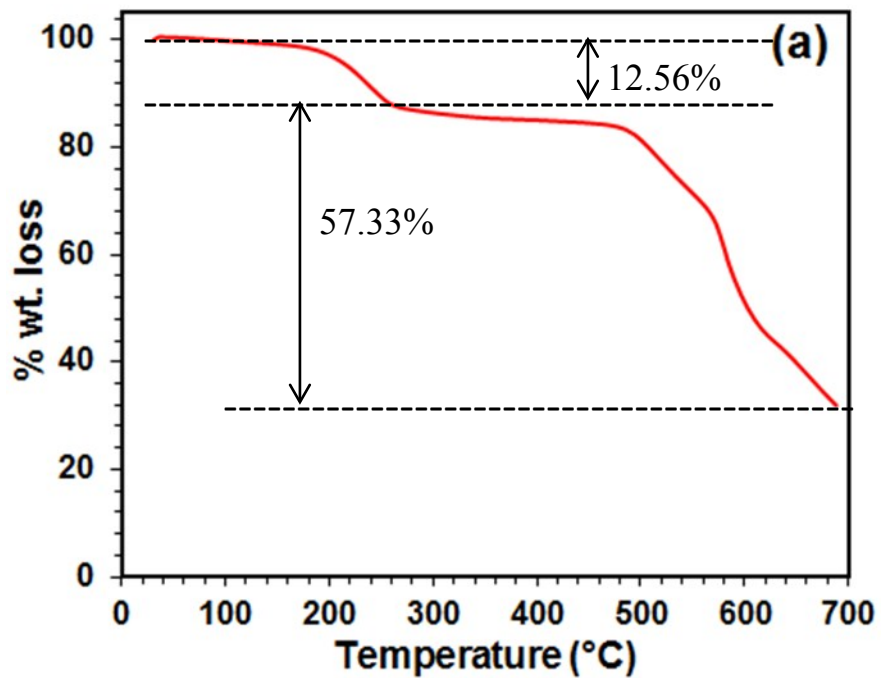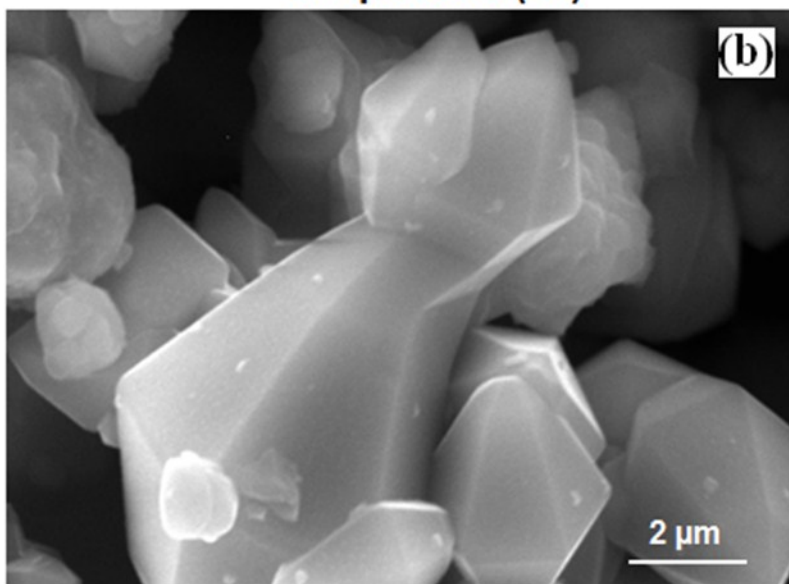

**Figure S1.** (a) Thermogravimetric plot and (b) SEM image of the synthesised ZIF-12.

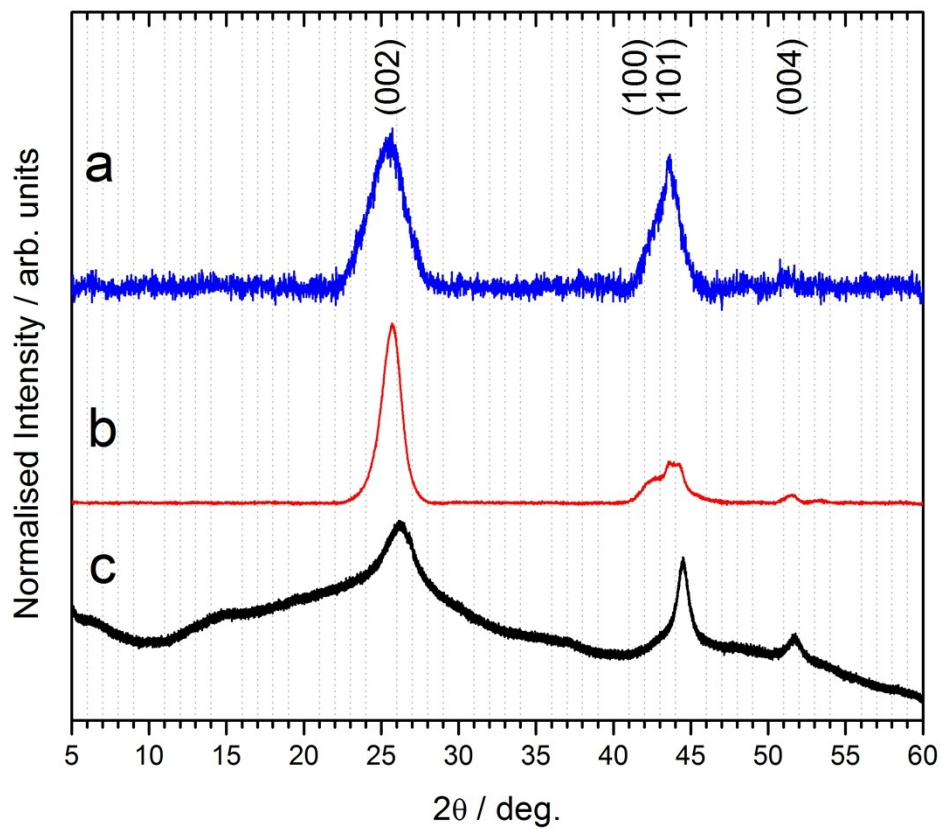

**Figure S2.** (a) SWCNT, (b) MWCNT, and (c) CoO/N-CNT (15 hour scan). Indices correspond to planes in graphitic carbon. SWCNT and MWCNT have had a background subtracted, CoO/N-CNT has no data subtraction performed.

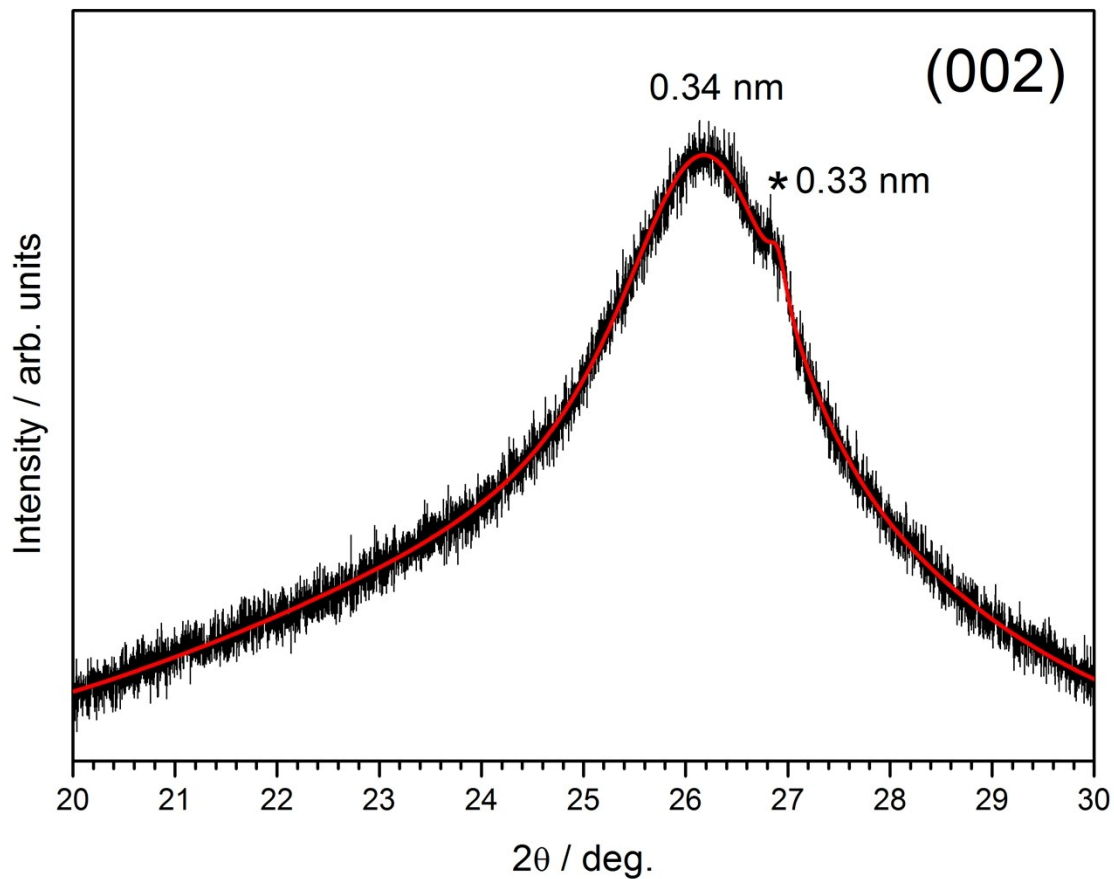

**Figure S3.** PXRD of the CoO/N-CNT material between  $2\theta = 20\text{-}30^\circ$ . The peak corresponding to the (002) plane reflection between graphitic layers in the carbon material shows two discrete  $d$ -spacings of 0.34 nm and 0.33 nm. Red line is a best-fit of Voigt line-shape to the data.

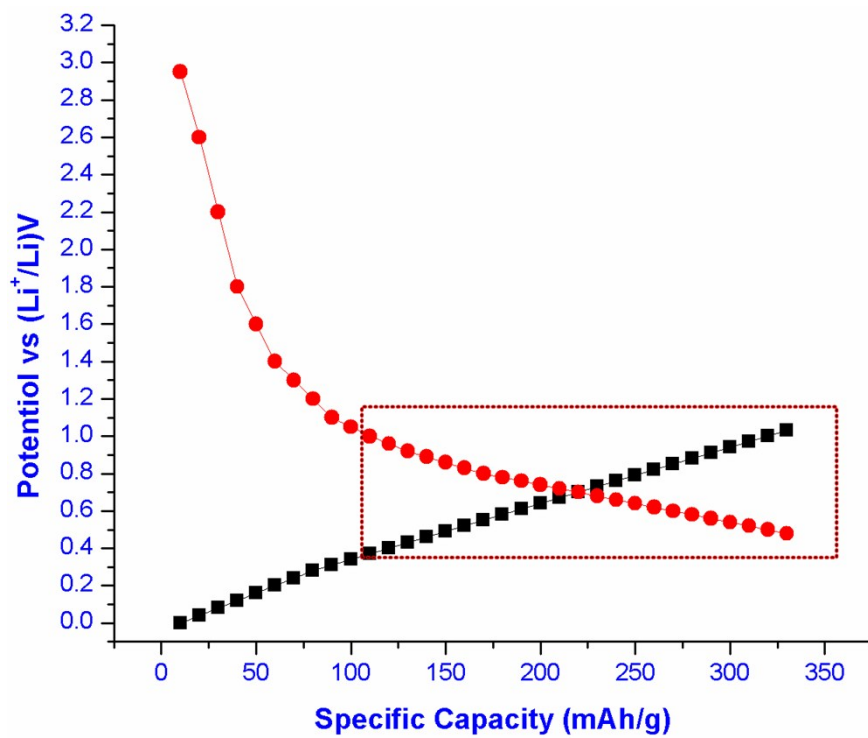

**Figure S4.** Magnified voltage profile of the CoO/N-CNTs showing small plateau (red) at ~1V.

**Table S1**– Atomic and weight percent composition of the CNT nanocomposite from XPS analysis.

| <b>Name</b>          | <b>Assignment</b>               | <b>Binding Energy<br/>(eV)</b> | <b>Atomic %</b> | <b>Weight<br/>%</b> |
|----------------------|---------------------------------|--------------------------------|-----------------|---------------------|
| C 1s                 | C=C/C–C                         | 284.5                          | 93.8            | 90.0                |
| *O 1s                | O in Cobalt Oxides              | 531.3                          | 1.3             | 1.6                 |
| O 1s                 | O=C                             | 533.3                          | 0.9             | 1.2                 |
| Cl 2p <sub>3/2</sub> | Inorganic Chloride              | 197.5                          | 0.3             | 0.8                 |
| Cl 2p <sub>3/2</sub> | Organic Chloride                | 200.2                          | 0.3             | 0.7                 |
| N 1s                 | Pyridinic Nitrogen              | 398.6                          | 1.2             | 1.4                 |
| N 1s                 | Graphitic Nitrogen              | 400.9                          | 1.8             | 2.0                 |
| Co 2p <sub>3/2</sub> | Co Metal                        | 778.5                          | 0.1             | 0.4                 |
| Co 2p <sub>3/2</sub> | Cobalt Oxides                   | 780.5                          | 0.3             | 1.5                 |
| Co 2p <sub>3/2</sub> | Cobalt Oxides<br>Satellite Peak | 784.4                          | 0.1             | 0.4                 |

**Table S2**– Data of the columbic efficiency with different cycle numbers.

|                         |    |    |    |    |    |
|-------------------------|----|----|----|----|----|
| Cycle numbers           | 1  | 2  | 5  | 10 | 50 |
| Columbic efficiency (%) | 83 | 85 | 90 | 95 | 97 |
